# Supplementary material
Source: Springer Nature journal article supplement (https://www.springermedizin.de/resource/supplementary/13046_2008_57_MOESM1_ESM.pdf/9661422)

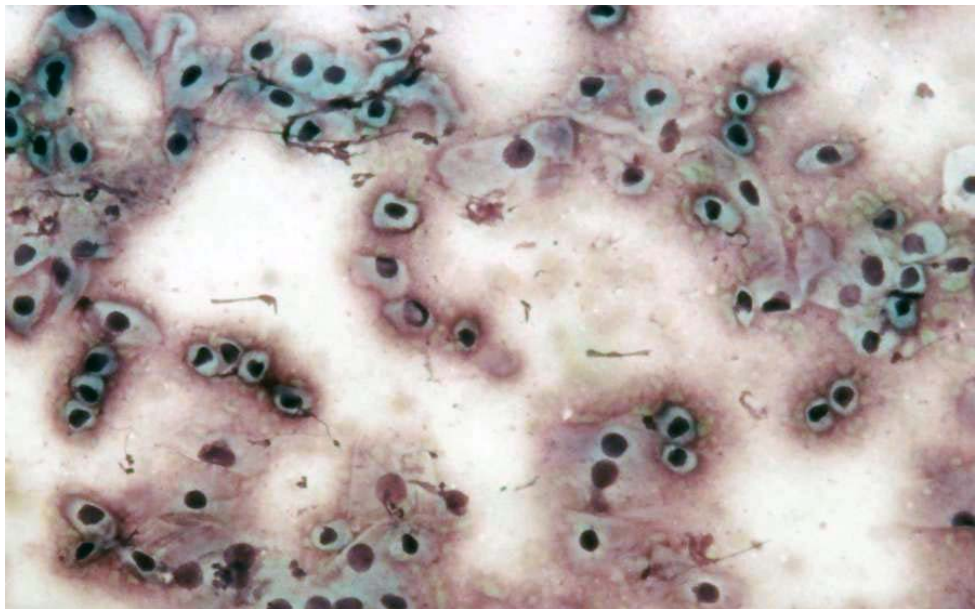

Supplement: MOESM1 [file 9661422]
